# Supplementary material for: Camphor-Engine-Driven Micro-Boat Guides Evolution of Chemical Gardens
Source: PubMed Central journal article supplement (PMC5479842; doi:10.1038/s41598-017-04337-w), 2017-06-21
Supplement: 41598_2017_4337_MOESM2_ESM.pdf [file 41598_2017_4337_MOESM2_ESM.pdf]

# **Camphor-Engine-Driven Micro-Boat Guides Evolution of Chemical Gardens**

Mark Frenkel<sup>a,b</sup>, Victor Multanen<sup>b</sup>, Roman Grynyov<sup>a</sup>, Albina Musin<sup>a</sup>, Yelena Bormashenko<sup>b</sup>, Edward Bormashenko,<sup>b\*</sup>

*<sup>a</sup>Ariel University, Natural Science Faculty, Physics Department, P.O.B. 3, 407000, Ariel, Israel*

*<sup>b</sup>Ariel University, Engineering Faculty, Chemical Engineering Department, P.O.B. 3, 407000, Ariel, Israel*

\*Corresponding author: Edward Bormashenko

Ariel University, Natural Science Faculty, Physics Department, Chemical Engineering and Biotechnology Department, P.O.B. 3, Ariel 40700, Israel

Phone: +972-3-906-6134; Fax: +972-3-906-6621

E-mail: edward@ariel.ac.il

**Supplementary Video:** Heliciform precipitates formed under the self-propulsion of the micro-boat.

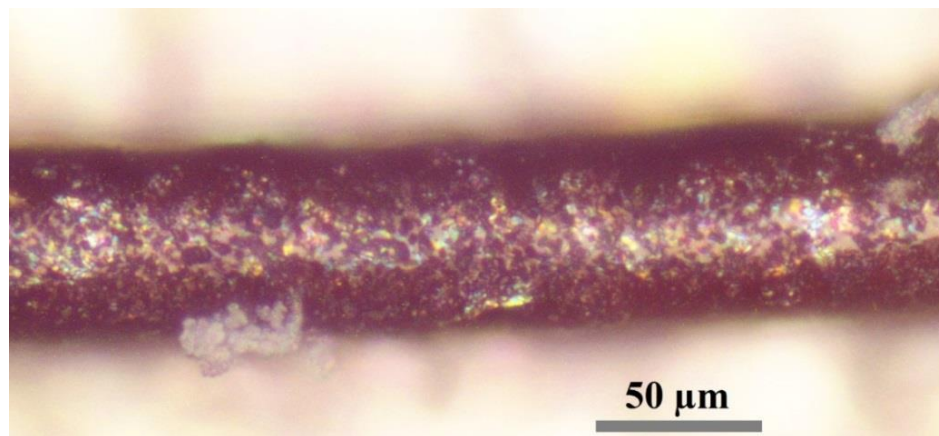

a.

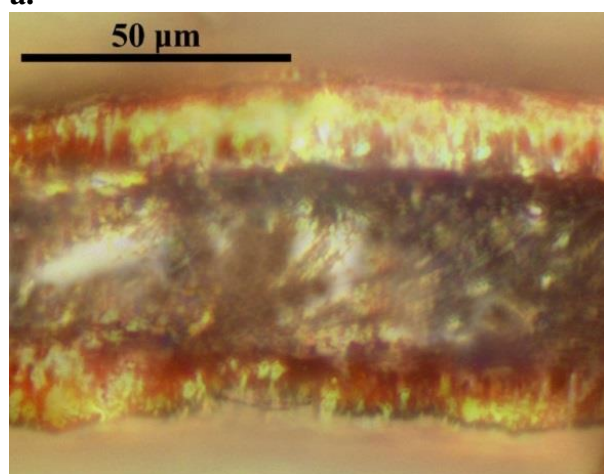

b.

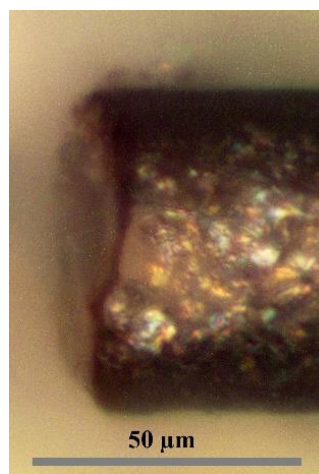

c.

**Supplementary Figure S1. a - The filament typical for chemical gardens is shown; the magnification is  $\times 600$ ; b - The same filament cut lengthwise; c - The butt of the filament; the magnification is  $\times 750$ .**

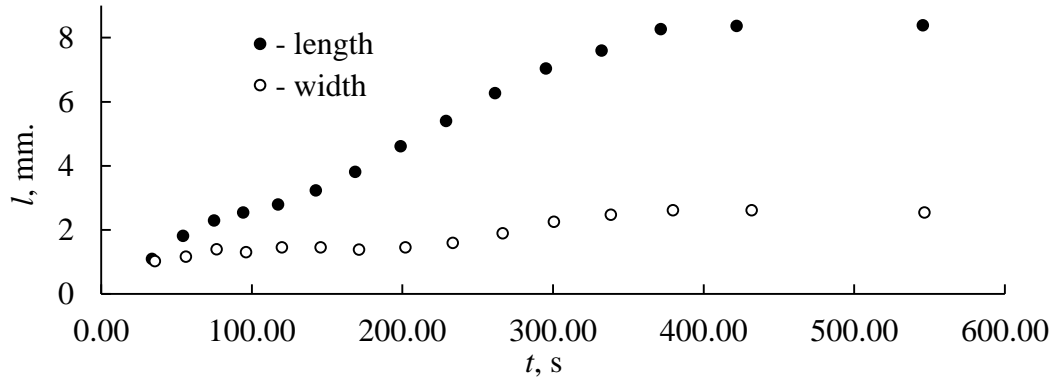

**Supplementary Figure S2. The time dependence of changes in geometrical parameters of the precipitate (the concentration of  $K_4Fe(CN)_6$   $c=2$  wt.%).**

**Supplementary Table S1. Values of fitting parameters  $\tilde{a}$ ,  $\alpha$ ,  $\tau_d$  and  $\tau_{fr}$  extracted from the experimental data.**

| Potassium hexacyanoferrate concentration, $c$ wt. % | Boat length, $L$ , mm | $\tilde{a}$ , m/s <sup>2</sup> | $\alpha$              | $\tau_d$ , s | $\tau_{fr}$ , s |
|-----------------------------------------------------|-----------------------|--------------------------------|-----------------------|--------------|-----------------|
| 2.0 (Fig. 7 a)                                      | 15                    | 0.023                          | $1.33 \times 10^{-4}$ | 186.0        | 3.85            |
| 0.125 (Fig. 7 b)                                    | 15                    | 0.023                          | $1.3 \times 10^{-4}$  | 31.5         | 0.73            |
| 2.0 (Fig. 7 c)                                      | 10                    | 0.021                          | $7.94 \times 10^{-5}$ | 35.3         | 0.67            |
| 0.25 (Fig. 7 c)                                     | 15                    | 0.014                          | $8.04 \times 10^{-5}$ | 50.2         | 0.93            |

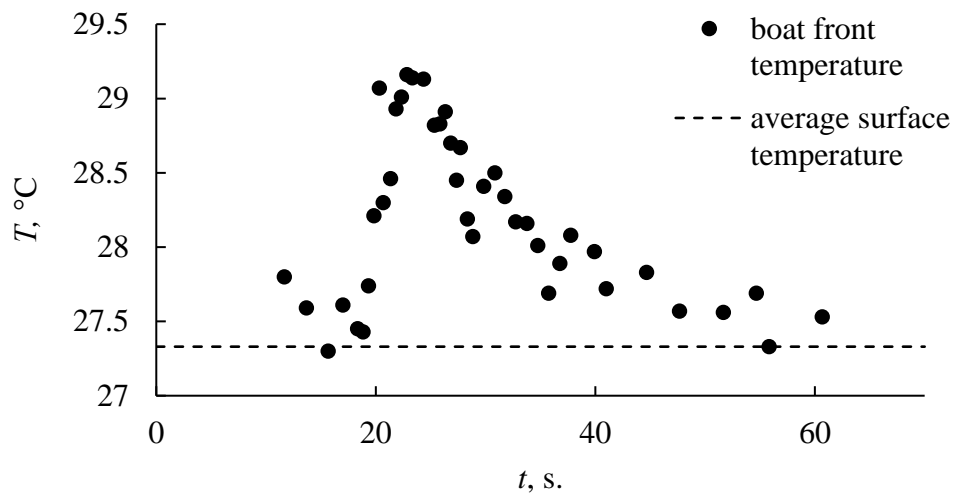

**a.**

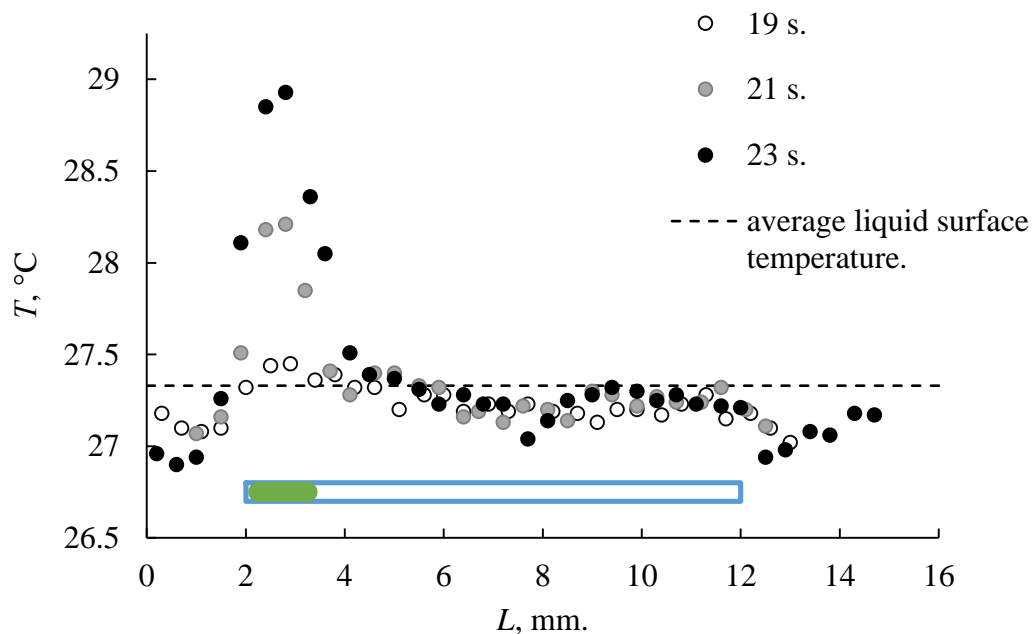

**b.**

**Supplementary Figure S3. Temporal (a) and spatial (b) temperature distributions**

**during the self-propulsion.** **a** - The time dependence of the temperature of the boat front ( $c=0.25$  wt.%). The temperature jump in the initial period of self-locomotion is clearly seen. **b** - The temperature distribution along the micro-boat surface ( $c=0.250$  wt.%). The blue rectangle represents the micro-boat in its real dimensions.

The rotational motion of the micro-boat along the rim of the Petri dish should be addressed within the model developed in Ref. 51. Let the vertical axis  $Z$  be coinciding with the inner side of the skirting of the rim of the Petri dish, as shown in Supplementary Figure S4.

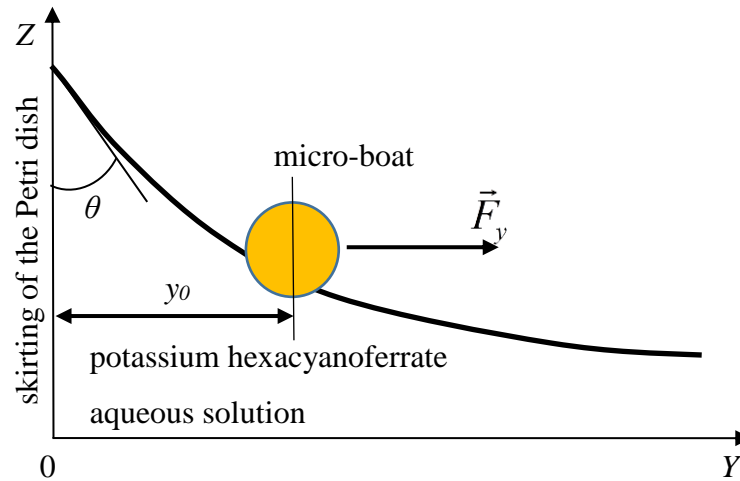

**Supplementary Figure S4. The cross-section of the PVC tubing (micro-boat) driven by the camphor engine is depicted with yellow color. The contact angle  $\theta$  formed by the potassium hexacyanoferrate aqueous solution and the rim of the Petri dish is shown.**

The micro-boat rotates in the Petri dish at the distance of *ca.* 1 cm from the rim ( $y_0 \cong 1 \text{ cm}$  in Fig 6 and Supplementary Fig. S4). Assume that the meniscus formed by the potassium hexacyanoferrate aqueous solution with the rim has the contact angle  $\theta$  (established experimentally with the goniometer as  $\theta=35\pm 1^\circ$ ; the contact angle hysteresis<sup>52</sup> is neglected). Bush et al. demonstrated that in this case, the lateral force  $\vec{F}_y$  acts on the micro-boat<sup>51</sup> (Fig 6 and Supplementary Fig. S4):

$$|\vec{F}_y| = -T \cot \theta \exp\left(-\frac{y_0}{l_{ca}}\right), \quad (6)$$

where  $T$  is the modulus of the vertical force exerted by a floating body on a liquid/vapor interface, and  $l_{ca} = \sqrt{\gamma/\rho g}$  is the capillary length.<sup>52</sup> In our case, the lateral force  $\vec{F}_y$  is the centripetal force acting on the micro-boat; thus we obtain:

$$T \cot \theta \exp\left(-\frac{y_0}{l_{ca}}\right) \cong \frac{mv_{cm}^2}{R - y_0}, \quad (7)$$

where  $R$  is the internal radius of the Petri dish. Assuming for the sake of a very rough estimation:  $\theta \cong 35^\circ$ ;  $y_0 \cong 1\text{ cm}$ ,  $l_{ca} \cong 0.271\text{ cm}$ ;  $R = 5\text{ cm}$ ;  $T \cong \frac{1}{2}mg$  yields:

$$v_{cm} \approx \sqrt{\frac{1}{2}(R - y_0)g \exp\left(-\frac{y_0}{l_{ca}}\right)} \cong 8.5 \frac{\text{cm}}{\text{s}}, \quad (8)$$

which is an overestimated value (friction is neglected) but reasonable, when compared with the experimentally observed characteristic velocity of rotation of micro-boats.
